# Supplementary material for: Analysis of the Frequency of Mutations at Diagnostic Oligonucleotide Sites and Their Impact on the Efficiency of PCR for HIV-1
Source: MDPI journal article supplement (doi:10.3390/microorganisms11122838), 2023-11-22
Supplement: s1 [file s1]

## Supplementary materials

| Name       | GGGATTGGGGGGTACAGTGCAGGG | Pct    | Count |
|------------|--------------------------|--------|-------|
| cluster 0  | .....                    | 70.03% | 4430  |
| cluster 1  | .....A.....              | 9.8%   | 620   |
| cluster 2  | .....A                   | 4.41%  | 279   |
| cluster 3  | .....A.....              | 2.97%  | 188   |
| cluster 4  | .....T.....              | 1.77%  | 112   |
| cluster 5  | .....A.....              | 1.5%   | 95    |
| cluster 6  | .....C.....              | 0.87%  | 55    |
| cluster 7  | .....C.....A             | 0.68%  | 43    |
| cluster 8  | .....A.....A             | 0.63%  | 40    |
| cluster 9  | .....A.....              | 0.6%   | 38    |
| cluster 10 | .....AC.....             | 0.33%  | 21    |
| cluster 11 | .....T.....              | 0.28%  | 18    |
| cluster 12 | .....AC...T.....         | 0.28%  | 18    |
| cluster 13 | .....G.....              | 0.27%  | 17    |
| cluster 14 | .....AC..T.....          | 0.27%  | 17    |
| cluster 15 | .....C.....              | 0.25%  | 16    |
| cluster 16 | .....A..T.....           | 0.24%  | 15    |
| cluster 17 | .....R.....              | 0.24%  | 15    |
| cluster 18 | .....R.....              | 0.24%  | 15    |
| cluster 19 | .....T.....              | 0.22%  | 14    |
| cluster 20 | .....T.....A             | 0.22%  | 14    |
| cluster 21 | .....A.....A             | 0.17%  | 11    |
| cluster 22 | .....Y.....              | 0.14%  | 9     |
| cluster 23 | .....A..T.....           | 0.13%  | 8     |
| cluster 24 | .....R.....              | 0.11%  | 7     |
| cluster 25 | .....AA.....             | 0.09%  | 6     |
| cluster 26 | .....T.....              | 0.09%  | 6     |
| cluster 27 | .....G.....              | 0.09%  | 6     |
| cluster 28 | .....C.....              | 0.08%  | 5     |
| cluster 29 | ..A.....                 | 0.08%  | 5     |
| cluster 30 | .....A...C.....          | 0.08%  | 5     |
| cluster 31 | .....C.....              | 0.08%  | 5     |
| cluster 32 | .....A.....A             | 0.06%  | 4     |
| cluster 33 | .....AT..T.....          | 0.06%  | 4     |
| cluster 34 | .....AT...T.....         | 0.06%  | 4     |
| cluster 35 | .....R.....              | 0.05%  | 3     |
| cluster 36 | .....C.....              | 0.05%  | 3     |
| cluster 37 | .....AC..T.C.....        | 0.05%  | 3     |
| cluster 38 | ...C.....                | 0.05%  | 3     |
| cluster 39 | .....R.....A             | 0.05%  | 3     |
| cluster 40 | .....A.....C.....        | 0.05%  | 3     |
| cluster 41 | .....A....T.....         | 0.05%  | 3     |
| cluster 42 | .....C.....              | 0.03%  | 2     |
| cluster 43 | .....T.....A             | 0.03%  | 2     |
| cluster 44 | .....AA...C.....         | 0.03%  | 2     |
| cluster 45 | .....C.....              | 0.03%  | 2     |
| cluster 46 | .....A.....A             | 0.03%  | 2     |
| cluster 47 | .....A.....C.....        | 0.03%  | 2     |
| cluster 48 | .....A.A.....            | 0.03%  | 2     |
| cluster 49 | .....AA.....A            | 0.03%  | 2     |
| cluster 50 | .....A.....R             | 0.03%  | 2     |
| cluster 51 | .....T.....              | 0.03%  | 2     |

Figure S1 - Los Alamos Database. Region of the HIV-1 genome corresponding to the TaqMan probe.

Clusters with frequently occurring single mutations are highlighted in a frame.

| Name       | GGGATTGGGGGTACAGTGCAGGG | Pct    | Count |
|------------|-------------------------|--------|-------|
| cluster 0  | .....                   | 81.03% | 974   |
| cluster 1  | .....A.....             | 6.07%  | 73    |
| cluster 2  | .....A.....             | 2.41%  | 29    |
| cluster 3  | .....A.....             | 2.16%  | 26    |
| cluster 4  | .....C.....             | 1.25%  | 15    |
| cluster 5  | .....T.....             | 0.75%  | 9     |
| cluster 6  | .....T.....             | 0.58%  | 7     |
| cluster 7  | .....A.....             | 0.42%  | 5     |
| cluster 8  | .....R.....             | 0.42%  | 5     |
| cluster 9  | .....R.....             | 0.42%  | 5     |
| cluster 10 | .....Y.....             | 0.42%  | 5     |
| cluster 11 | .....A.....A            | 0.42%  | 5     |
| cluster 12 | .....C.....             | 0.33%  | 4     |
| cluster 13 | .....R.....             | 0.33%  | 4     |
| cluster 14 | .....AA.....A           | 0.25%  | 3     |
| cluster 15 | .....Y.....             | 0.17%  | 2     |
| cluster 16 | .....A.....A            | 0.17%  | 2     |
| cluster 17 | .....AC.....            | 0.17%  | 2     |
| cluster 18 | .....R.....             | 0.17%  | 2     |
| cluster 19 | .....A.....             | 0.08%  | 1     |
| cluster 20 | .....G.....G.....       | 0.08%  | 1     |
| cluster 21 | .....T.....             | 0.08%  | 1     |
| cluster 22 | .....W.....             | 0.08%  | 1     |
| cluster 23 | .....N.....             | 0.08%  | 1     |
| cluster 24 | .....A...T.....         | 0.08%  | 1     |
| cluster 25 | .....G.....             | 0.08%  | 1     |
| cluster 26 | .....C.....             | 0.08%  | 1     |
| cluster 27 | .....R.....R            | 0.08%  | 1     |
| cluster 28 | .....C...T.....         | 0.08%  | 1     |
| cluster 29 | .RK.....WA.R...S...A    | 0.08%  | 1     |
| cluster 30 | .....R...S.....         | 0.08%  | 1     |
| cluster 31 | .....G.....             | 0.08%  | 1     |
| cluster 32 | .A.....                 | 0.08%  | 1     |
| cluster 33 | .....G.....             | 0.08%  | 1     |
| cluster 34 | R.....A.....            | 0.08%  | 1     |
| cluster 35 | .....R...C.....         | 0.08%  | 1     |
| cluster 36 | .R.....                 | 0.08%  | 1     |
| cluster 37 | .....K.....             | 0.08%  | 1     |
| cluster 38 | .....A...W.....         | 0.08%  | 1     |
| cluster 39 | .....T.TA.AG.A.TG.A.AA. | 0.08%  | 1     |
| cluster 40 | .....AC...T.....        | 0.08%  | 1     |
| cluster 41 | .....A.....             | 0.08%  | 1     |
| cluster 42 | .....A...C.....         | 0.08%  | 1     |
| cluster 43 | .....A...T.....         | 0.08%  | 1     |

Figure S2 - NCBI Database (Russian isolates). Region of the HIV-1 genome corresponding to the TaqMan probe.

Clusters with frequently occurring single mutations are highlighted in a frame.

|            | 3'  5' |        |       |
|------------|------------------------------------------------------------------------------------------|--------|-------|
| Name       | CAGCAGTACAAATGGCAGTATTCATYCACA                                                           | Pct(%) | Count |
| cluster 0  | .....                                                                                    | 73.07  | 4624  |
| cluster 1  | .....G.....                                                                              | 6.62   | 419   |
| cluster 2  | .....G.....                                                                              | 3.05   | 193   |
| cluster 3  | .....G.....                                                                              | 1.96   | 124   |
| cluster 4  | .....C.....                                                                              | 1.6    | 101   |
| cluster 5  | .....T.....                                                                              | 1.44   | 91    |
| cluster 6  | .....TG.....                                                                             | 1.02   | 64    |
| cluster 7  | .....A.....                                                                              | 0.82   | 52    |
| cluster 8  | .....C.....                                                                              | 0.68   | 43    |
| cluster 9  | .....G.....                                                                              | 0.47   | 30    |
| cluster 10 | .....G.....                                                                              | 0.41   | 26    |
| cluster 11 | .....T.....                                                                              | 0.4    | 25    |
| cluster 12 | .....C.....                                                                              | 0.34   | 22    |
| cluster 13 | .....T.....                                                                              | 0.34   | 21    |
| cluster 14 | ...T.....                                                                                | 0.32   | 20    |
| cluster 15 | .G.....                                                                                  | 0.31   | 20    |
| cluster 16 | ...G.....                                                                                | 0.3    | 19    |
| cluster 17 | .....G.....G.....                                                                        | 0.29   | 18    |
| cluster 18 | .....T.....                                                                              | 0.26   | 17    |
| cluster 19 | .....T.....                                                                              | 0.26   | 17    |
| cluster 20 | .....C.....                                                                              | 0.22   | 14    |
| cluster 21 | .....G..G.....                                                                           | 0.19   | 12    |
| cluster 22 | .....G.....A.....                                                                        | 0.17   | 11    |
| cluster 23 | .T.....                                                                                  | 0.17   | 11    |
| cluster 24 | .....R.....                                                                              | 0.15   | 10    |
| cluster 25 | .....GC.....                                                                             | 0.13   | 8     |
| cluster 26 | .....R.....                                                                              | 0.11   | 7     |
| cluster 27 | .....Y.....                                                                              | 0.11   | 7     |
| cluster 28 | .....R.....                                                                              | 0.11   | 7     |
| cluster 29 | .....T.....                                                                              | 0.11   | 7     |
| cluster 30 | .....G.....G.....                                                                        | 0.11   | 7     |
| cluster 31 | .....G.....C.....                                                                        | 0.1    | 6     |
| cluster 32 | .....C.....                                                                              | 0.08   | 5     |
| cluster 33 | .....G.....G..T.....                                                                     | 0.08   | 5     |
| cluster 34 | .....A.....                                                                              | 0.08   | 5     |
| cluster 35 | .....R.....                                                                              | 0.08   | 5     |
| cluster 36 | .....A.....                                                                              | 0.08   | 5     |
| cluster 37 | .R.....                                                                                  | 0.08   | 5     |
| cluster 38 | .....T.....                                                                              | 0.08   | 5     |
| cluster 39 | ...C.....                                                                                | 0.07   | 4     |
| cluster 40 | .....A.....                                                                              | 0.07   | 4     |
| cluster 41 | .C.....                                                                                  | 0.07   | 4     |
| cluster 42 | .....Y.....                                                                              | 0.07   | 4     |
| cluster 43 | .....C..TG.....                                                                          | 0.06   | 4     |
| cluster 44 | .....G.....                                                                              | 0.05   | 3     |
| cluster 45 | .....G.....                                                                              | 0.05   | 3     |
| cluster 46 | .....T.....                                                                              | 0.05   | 3     |
| cluster 47 | .G.....G.....                                                                            | 0.05   | 3     |
| cluster 48 | .....C.....                                                                              | 0.05   | 3     |
| cluster 49 | .....G.....C.....                                                                        | 0.05   | 3     |
| cluster 50 | .....G.....C.....                                                                        | 0.05   | 3     |
| cluster 51 | ...A.....                                                                                | 0.05   | 3     |
| cluster 52 | .....M.....                                                                              | 0.05   | 3     |
| cluster 53 | .....W.....                                                                              | 0.05   | 3     |
| cluster 54 | .A.....                                                                                  | 0.05   | 3     |
| cluster 55 | .....G.....G.....                                                                        | 0.05   | 3     |
| cluster 56 | .....G.....G.....                                                                        | 0.05   | 3     |
| cluster 57 | .....G.....T.....                                                                        | 0.05   | 3     |
| cluster 58 | .....T..G.....                                                                           | 0.05   | 3     |
| cluster 59 | .....G.....TG.....                                                                       | 0.05   | 3     |
| cluster 60 | .....T.....TG.....                                                                       | 0.05   | 3     |
| cluster 61 | .W.....                                                                                  | 0.04   | 2     |

Figure S3 - Los Alamos Database. Region of the HIV-1 genome corresponding to the forward primer.

3'  5'

| Name       | CAGCAGTACAAATGGCAGTATTCATYCACA | Pct   | Count |
|------------|--------------------------------|-------|-------|
| cluster 0  | .....                          | 76.36 | 921   |
| cluster 1  | .....G.....                    | 6.97  | 84    |
| cluster 2  | .....G.....                    | 1.74  | 21    |
| cluster 3  | .....T.....                    | 1.32  | 16    |
| cluster 4  | .....G.....                    | 1.08  | 13    |
| cluster 5  | ...G.....                      | 1.0   | 12    |
| cluster 6  | .....R.....                    | 0.99  | 12    |
| cluster 7  | .....G.....                    | 0.83  | 10    |
| cluster 8  | .....A.....                    | 0.83  | 10    |
| cluster 9  | .....R.....                    | 0.83  | 10    |
| cluster 10 | .....C.....                    | 0.75  | 9     |
| cluster 11 | .....R.....                    | 0.5   | 6     |
| cluster 12 | ...C.....                      | 0.41  | 5     |
| cluster 13 | ...T.....                      | 0.33  | 4     |
| cluster 14 | .....C.....                    | 0.33  | 4     |
| cluster 15 | .....Y.....                    | 0.33  | 4     |
| cluster 16 | .G.....                        | 0.25  | 3     |
| cluster 17 | .....TG.....                   | 0.25  | 3     |
| cluster 18 | .....W.....                    | 0.17  | 2     |
| cluster 19 | .....C.....                    | 0.17  | 2     |
| cluster 20 | .....R.....                    | 0.17  | 2     |
| cluster 21 | .....T.....G..C.....           | 0.17  | 2     |
| cluster 22 | .....T.....                    | 0.17  | 2     |
| cluster 23 | .....G.....T.....              | 0.17  | 2     |
| cluster 24 | ...R.....                      | 0.17  | 2     |
| cluster 25 | .....T.....                    | 0.17  | 2     |
| cluster 26 | ...T.....                      | 0.17  | 2     |
| cluster 27 | .....W.....                    | 0.17  | 2     |
| cluster 28 | ...T....TG....T....T...C..     | 0.08  | 1     |
| cluster 29 | .....W.....                    | 0.08  | 1     |
| cluster 30 | .W.....                        | 0.08  | 1     |
| cluster 31 | ...G..C.....                   | 0.08  | 1     |
| cluster 32 | .....T.....                    | 0.08  | 1     |
| cluster 33 | .....R.....                    | 0.08  | 1     |
| cluster 34 | .....G.....                    | 0.08  | 1     |
| cluster 35 | ...C...G.....                  | 0.08  | 1     |
| cluster 36 | ...AC.....                     | 0.08  | 1     |
| cluster 37 | .R.....                        | 0.08  | 1     |
| cluster 38 | .....R.T.....                  | 0.08  | 1     |
| cluster 39 | .....G.....A.....              | 0.08  | 1     |
| cluster 40 | .T.....                        | 0.08  | 1     |
| cluster 41 | .....MA.....                   | 0.08  | 1     |
| cluster 42 | ...R.....                      | 0.08  | 1     |
| cluster 43 | ...T.....T.....                | 0.08  | 1     |
| cluster 44 | .....R.....                    | 0.08  | 1     |
| cluster 45 | .....W.....                    | 0.08  | 1     |
| cluster 46 | .....G....A.....               | 0.08  | 1     |
| cluster 47 | .....R.....M.....              | 0.08  | 1     |
| cluster 48 | .....T.....                    | 0.08  | 1     |
| cluster 49 | Y.....                         | 0.08  | 1     |
| cluster 50 | .....C..T.....                 | 0.08  | 1     |
| cluster 51 | .....M.....                    | 0.08  | 1     |
| cluster 52 | ...G.....G.....                | 0.08  | 1     |
| cluster 53 | .G..G.....                     | 0.08  | 1     |
| cluster 54 | .....M.....                    | 0.08  | 1     |
| cluster 55 | .....Y.....                    | 0.08  | 1     |
| cluster 56 | .....G..G.....                 | 0.08  | 1     |
| cluster 57 | .....G.....M...                | 0.08  | 1     |
| cluster 58 | .....R..G.....                 | 0.08  | 1     |
| cluster 59 | ...G.....S...                  | 0.08  | 1     |
| cluster 60 | ...M.....                      | 0.08  | 1     |
| cluster 61 | .....R..R.....                 | 0.08  | 1     |

Figure S4 - NCBI Database (Russian isolates). Region of the HIV-1 genome corresponding to the forward primer.

|            | 3'←                            | 5'     |       |  |
|------------|--------------------------------|--------|-------|--|
| Name       | TGGAAAGGTGAAGGGCAGTRGTAATACAGG | Pct(%) | Count |  |
| cluster 0  | .....A.                        | 62.13  | 3929  |  |
| cluster 1  | .....                          | 13.36  | 845   |  |
| cluster 2  | .....C.....A.                  | 4.36   | 276   |  |
| cluster 3  | .....G.....A.                  | 4.13   | 261   |  |
| cluster 4  | .....A.....A.                  | 2.17   | 137   |  |
| cluster 5  | .....G.....A.                  | 1.83   | 116   |  |
| cluster 6  | .....T..A.                     | 1.61   | 102   |  |
| cluster 7  | .....C.....A.                  | 1.05   | 66    |  |
| cluster 8  | .....G..A.....C.....A.         | 0.65   | 41    |  |
| cluster 9  | .....G.....                    | 0.57   | 36    |  |
| cluster 10 | .....G.....                    | 0.55   | 35    |  |
| cluster 11 | .....T.....A.                  | 0.34   | 21    |  |
| cluster 12 | .....A.....                    | 0.31   | 20    |  |
| cluster 13 | .....AC                        | 0.30   | 19    |  |
| cluster 14 | .....C.....                    | 0.27   | 17    |  |
| cluster 15 | .....A.....C.....A.            | 0.19   | 12    |  |
| cluster 16 | .....A.....G.....A.            | 0.17   | 11    |  |
| cluster 17 | .....R.....                    | 0.16   | 10    |  |
| cluster 18 | .....C..A.                     | 0.16   | 10    |  |
| cluster 19 | .....G..A.....A.               | 0.16   | 10    |  |
| cluster 20 | .....A.....C..A.               | 0.16   | 10    |  |
| cluster 21 | .....T.....                    | 0.14   | 9     |  |
| cluster 22 | .....T.....A.                  | 0.13   | 8     |  |
| cluster 23 | .....G.....G.....A.            | 0.13   | 8     |  |
| cluster 24 | .....R.....A.                  | 0.13   | 8     |  |
| cluster 25 | .....T.....A.                  | 0.13   | 8     |  |
| cluster 26 | .....AT                        | 0.12   | 8     |  |
| cluster 27 | .....A.....A.                  | 0.11   | 7     |  |
| cluster 28 | .....C.....                    | 0.11   | 7     |  |
| cluster 29 | .....C.....A.                  | 0.11   | 7     |  |
| cluster 30 | .....A.A.                      | 0.09   | 6     |  |
| cluster 31 | .....G.....A.                  | 0.09   | 6     |  |
| cluster 32 | .....C.....A.                  | 0.09   | 6     |  |
| cluster 33 | .....G.....C.....A.            | 0.08   | 5     |  |
| cluster 34 | ...G.....A.                    | 0.08   | 5     |  |
| cluster 35 | .....C.....                    | 0.07   | 4     |  |
| cluster 36 | .....A.....A.                  | 0.07   | 4     |  |
| cluster 37 | .....A.....                    | 0.06   | 4     |  |
| cluster 38 | C.....A.                       | 0.06   | 4     |  |
| cluster 39 | .....G.....A.                  | 0.06   | 4     |  |
| cluster 40 | .....M.....A.                  | 0.06   | 4     |  |
| cluster 41 | .....R.....A.                  | 0.06   | 4     |  |
| cluster 42 | .....T.....                    | 0.06   | 4     |  |
| cluster 43 | .....G.....AC                  | 0.06   | 4     |  |
| cluster 44 | .....G..A.....T.....A.         | 0.06   | 4     |  |
| cluster 45 | ....G.....A.                   | 0.05   | 3     |  |
| cluster 46 | .....W.....A.                  | 0.05   | 3     |  |
| cluster 47 | .....T.....                    | 0.05   | 3     |  |
| cluster 48 | .....A.....A.                  | 0.05   | 3     |  |
| cluster 49 | .....G..T..A.                  | 0.05   | 3     |  |
| cluster 50 | .....R.....A.                  | 0.05   | 3     |  |
| cluster 51 | .....T.....C.....A.            | 0.05   | 3     |  |
| cluster 52 | .....T.....A.                  | 0.05   | 3     |  |
| cluster 53 | .....M..A.                     | 0.05   | 3     |  |
| cluster 54 | .....R..A.....C.....A.         | 0.05   | 3     |  |
| cluster 55 | .....G.....C.....A.            | 0.05   | 3     |  |
| cluster 56 | ...G.....A.                    | 0.05   | 3     |  |
| cluster 57 | .....C.....C.....A.            | 0.04   | 2     |  |
| cluster 58 | .....A.....                    | 0.03   | 2     |  |
| cluster 59 | .....A..G.....                 | 0.03   | 2     |  |
| cluster 60 | W.....A.                       | 0.03   | 2     |  |
| cluster 61 | .....T.....A.                  | 0.03   | 2     |  |

Figure S5 - Los Alamos Database. Region of the HIV-1 genome corresponding to the reverse primer.

|            | 3' ← 5'                         |       |       |
|------------|---------------------------------|-------|-------|
| Name       | TGGAAAGGTGAAGGGGCAGTRGTAATACAGG | Pct   | Count |
| cluster 0  | .....                           | 76.52 | 896   |
| cluster 1  | .....A.                         | 12.64 | 148   |
| cluster 2  | .....G.....                     | 3.08  | 36    |
| cluster 3  | .....G.....                     | 1.28  | 15    |
| cluster 4  | .....G.....A.                   | 1.11  | 13    |
| cluster 5  | .....G.....A.                   | 0.34  | 4     |
| cluster 6  | .....A.....                     | 0.34  | 4     |
| cluster 7  | .....R.....                     | 0.34  | 4     |
| cluster 8  | .....C.....                     | 0.26  | 3     |
| cluster 9  | .....C.....                     | 0.26  | 3     |
| cluster 10 | .....A.....                     | 0.26  | 3     |
| cluster 11 | .....R.....                     | 0.26  | 3     |
| cluster 12 | .....R.....                     | 0.18  | 2     |
| cluster 13 | ...G.....                       | 0.17  | 2     |
| cluster 14 | .....T....                      | 0.17  | 2     |
| cluster 15 | .....Y.....                     | 0.17  | 2     |
| cluster 16 | .....C....A.                    | 0.17  | 2     |
| cluster 17 | .....T..A.                      | 0.17  | 2     |
| cluster 18 | .....R.....                     | 0.17  | 2     |
| cluster 19 | .....G.G.....A.                 | 0.09  | 1     |
| cluster 20 | .....A..G.....A.                | 0.09  | 1     |
| cluster 21 | ..A.....                        | 0.09  | 1     |
| cluster 22 | .....G.....                     | 0.09  | 1     |
| cluster 23 | .....K.....                     | 0.09  | 1     |
| cluster 24 | .....M....                      | 0.09  | 1     |
| cluster 25 | .....M.....                     | 0.09  | 1     |
| cluster 26 | .....K.....                     | 0.09  | 1     |
| cluster 27 | .....C.....                     | 0.09  | 1     |
| cluster 28 | .....R.K.....                   | 0.09  | 1     |
| cluster 29 | .....GA.                        | 0.09  | 1     |
| cluster 30 | .....T.....                     | 0.09  | 1     |
| cluster 31 | .....GMK....                    | 0.09  | 1     |
| cluster 32 | .....M..A.                      | 0.09  | 1     |
| cluster 33 | .....R.....R.                   | 0.09  | 1     |
| cluster 34 | .....C.G..A.                    | 0.09  | 1     |
| cluster 35 | .....T.....A.                   | 0.09  | 1     |
| cluster 36 | .....R.....A.                   | 0.09  | 1     |
| cluster 37 | .....R....A.                    | 0.09  | 1     |
| cluster 38 | ...G.....G.....                 | 0.09  | 1     |
| cluster 39 | .....C....                      | 0.09  | 1     |
| cluster 40 | ..R.....RR                      | 0.09  | 1     |
| cluster 41 | .....C.G...G.....               | 0.09  | 1     |
| cluster 42 | .....A.....AA                   | 0.09  | 1     |
| cluster 43 | .....AC                         | 0.09  | 1     |

Figure S6 - NCBI Database (Russian isolates). Region of the HIV-1 genome corresponding to the reverse primer.

Table S1. Quantitative results obtained in Real-Time PCR and digital PCR for DNA constructs

|       | ddPCR/Bla |                    | PCR/HIV   |                    |                                                                      |
|-------|-----------|--------------------|-----------|--------------------|----------------------------------------------------------------------|
| Name  | Copies/ml | Copies/ml,<br>mean | Copies/ml | Copies/ml,<br>mean | HIV PCR Copies/ml, mean / <u>BLA</u><br><u>ddPCR Copies/ml, mean</u> |
| mut 1 | 1.96E+04  | 2.21E+04           | 296       | 233                | 0.01                                                                 |
|       | 2.48E+04  |                    | 112       |                    |                                                                      |
|       | 2.18E+04  |                    | 291       |                    |                                                                      |
| mut 2 | 2.16E+04  | 2.41E+04           | 1.34E+04  | 1.33E+04           | 0.55                                                                 |
|       | 2.50E+04  |                    | 1.28E+04  |                    |                                                                      |
|       | 2.56E+04  |                    | 1.37E+04  |                    |                                                                      |
|       |           |                    | 1.23E+04  | 1.22E+04           | 0.51                                                                 |
|       |           |                    | 1.35E+04  |                    |                                                                      |
|       |           |                    | 1.11E+04  |                    |                                                                      |
|       |           |                    | 1.24E+04  | 1.17E+04           | 0.49                                                                 |
|       |           |                    | 1.20E+04  |                    |                                                                      |
|       |           |                    | 1.08E+04  |                    |                                                                      |
|       |           |                    | 1.19E+04  | 1.22E+04           | 0.50                                                                 |
| mut 3 | 2.58E+04  | 2.48E+04           | 1.27E+04  | 1.34E+04           | 0.54                                                                 |
|       | 2.10E+04  |                    | 1.38E+04  |                    |                                                                      |
|       | 2.76E+04  |                    | 1.36E+04  |                    |                                                                      |
|       |           |                    | 1.53E+04  | 1.45E+04           | 0.59                                                                 |
|       |           |                    | 1.32E+04  |                    |                                                                      |
|       |           |                    | 1.52E+04  |                    |                                                                      |
|       |           |                    | 1.66E+04  | 1.53E+04           | 0.62                                                                 |
|       |           |                    | 1.45E+04  |                    |                                                                      |
|       |           |                    | 1.48E+04  |                    |                                                                      |
|       |           |                    | 1.32E+04  | 1.30E+04           | 0.52                                                                 |
| mut 4 | 2.96E+04  | 2.60E+04           | 8.56E+03  | 9.18E+03           | 0.35                                                                 |
|       | 2.12E+04  |                    | 1.09E+04  |                    |                                                                      |
|       | 2.72E+04  |                    | 8.32E+03  |                    |                                                                      |
|       |           |                    | 8.15E+03  | 9.55E+03           | 0.37                                                                 |
|       |           |                    | 9.94E+03  |                    |                                                                      |
|       |           |                    | 1.07E+04  |                    |                                                                      |
|       |           |                    | 1.03E+04  | 8.96E+03           | 0.34                                                                 |
|       |           |                    | 8.26E+03  |                    |                                                                      |
|       |           |                    | 8.45E+03  |                    |                                                                      |
|       |           |                    | 8.82E+03  | 7.50E+03           | 0.29                                                                 |
| mut 5 | 2.78E+04  | 2.43E+04           | 2.54E+04  | 2.63E+04           | 1.08                                                                 |
|       | 2.38E+04  |                    | 2.55E+04  |                    |                                                                      |
|       | 2.12E+04  |                    | 2.82E+04  |                    |                                                                      |
|       |           |                    | 3.54E+04  | 3.31E+04           | 1.36                                                                 |
|       |           |                    | 3.13E+04  |                    |                                                                      |
|       |           |                    | 3.26E+04  |                    |                                                                      |
|       |           |                    | 2.88E+04  | 2.79E+04           | 1.15                                                                 |

|       |          |          |          |          |      |
|-------|----------|----------|----------|----------|------|
|       |          |          | 2.61E+04 |          |      |
|       |          |          | 2.90E+04 |          |      |
|       |          |          | 2.65E+04 | 2.65E+04 | 1.09 |
|       |          |          | 2.47E+04 |          |      |
|       |          |          | 2.85E+04 |          |      |
| mut 6 | 2.10E+04 | 2.44E+04 | 3.54E+04 | 3.12E+04 | 1.28 |
|       | 2.68E+04 |          | 2.71E+04 |          |      |
|       | 2.54E+04 |          | 3.17E+04 |          |      |
|       |          |          | 3.48E+04 | 3.20E+04 | 1.31 |
|       |          |          | 3.08E+04 |          |      |
|       |          |          | 3.05E+04 |          |      |
|       |          |          | 2.84E+04 | 3.07E+04 | 1.26 |
|       |          |          | 3.56E+04 |          |      |
|       |          |          | 2.87E+04 |          |      |
|       |          |          | 2.92E+04 | 2.75E+04 | 1.13 |
|       |          |          | 2.52E+04 |          |      |
|       |          |          | 2.83E+04 |          |      |
| mut 7 | 3.12E+04 | 2.87E+04 | 3.35E+04 | 3.04E+04 | 1.06 |
|       | 2.76E+04 |          | 2.88E+04 |          |      |
|       | 2.72E+04 |          | 2.90E+04 |          |      |
|       |          |          | 3.49E+04 | 3.59E+04 | 1.25 |
|       |          |          | 3.81E+04 |          |      |
|       |          |          | 3.47E+04 |          |      |
|       |          |          | 3.06E+04 | 3.17E+04 | 1.11 |
|       |          |          | 2.87E+04 |          |      |
|       |          |          | 3.63E+04 |          |      |
|       |          |          | 2.69E+04 | 2.57E+04 | 0.89 |
|       |          |          | 2.74E+04 |          |      |
|       |          |          | 2.30E+04 |          |      |
| mut 8 | 2.82E+04 | 2.77E+04 | 9.53E+03 | 1.04E+04 | 0.38 |
|       | 2.90E+04 |          | 1.17E+04 |          |      |
|       | 2.60E+04 |          | 1.02E+04 |          |      |
|       |          |          | 1.10E+04 | 1.14E+04 | 0.41 |
|       |          |          | 1.12E+04 |          |      |
|       |          |          | 1.22E+04 |          |      |
|       |          |          | 1.20E+04 | 1.21E+04 | 0.44 |
|       |          |          | 1.29E+04 |          |      |
|       |          |          | 1.15E+04 |          |      |
|       |          |          | 1.17E+04 | 1.05E+04 | 0.38 |
|       |          |          | 8.26E+03 |          |      |
|       |          |          | 1.21E+04 |          |      |
| K+    | 2.84E+04 | 3.11E+04 | 2.81E+04 | 2.40E+04 | 0.77 |
|       | 3.20E+04 |          | 2.36E+04 |          |      |
|       | 3.30E+04 |          | 2.10E+04 |          |      |
|       |          |          | 2.43E+04 | 3.17E+04 | 1.02 |
|       |          |          | 4.63E+04 |          |      |
|       |          |          | 2.83E+04 |          |      |
|       |          |          | 1.88E+04 | 2.50E+04 | 0.80 |
|       |          |          | 2.08E+04 |          |      |
|       |          |          | 3.98E+04 |          |      |
|       |          |          | 2.24E+04 | 2.16E+04 | 0.70 |



|  |  |  |          |  |  |
|--|--|--|----------|--|--|
|  |  |  | 2.23E+04 |  |  |
|  |  |  | 2.03E+04 |  |  |
